# Supplementary material for: Orthogonal self-assembly of stimuli-responsive supramolecular polymers using one-step prepared heterotelechelic building blocks
Source: Royal Society of Chemistry journal article supplement (doi:10.1039/c2py20559a), 2012-08-21
Supplement: c2py20559a.pdf [file c2py20559a.pdf]

## Supporting Information

to

### **Stimuli-responsive self-assembly of one-step prepared supramolecular heterotelechelic polymers**

Ulrich Mansfeld,<sup>a,b,c</sup> Andreas Winter,<sup>a,b,c</sup> Martin D. Hager,<sup>a,b,c</sup> Richard Hoogenboom,<sup>d</sup> Wolfgang Günther<sup>a</sup> and Ulrich S. Schubert<sup>\*a,b,c</sup>

<sup>a</sup> *Laboratory of Organic and Macromolecular Chemistry (IOMC), Friedrich-Schiller-University Jena, Humboldtstr. 10, 07743 Jena, Germany. Fax: +49 (0)3641 948202; Tel: +49 (0)3641 948200; E-mail: ulrich.schubert@uni-jena.de; Internet: www.schubert-group.de*

<sup>b</sup> *Jena Center for Soft Matter (JCSM), Friedrich-Schiller-University Jena, Philosophenweg 7, 07743 Jena, Germany*

<sup>c</sup> *Dutch Polymer Institute (DPI), P.O. Box 902, 5600 AX Eindhoven, The Netherlands*

<sup>d</sup> *Department of Organic Chemistry, Ghent University, Krijkslaan 218 S4, 9000 Ghent, Belgium*

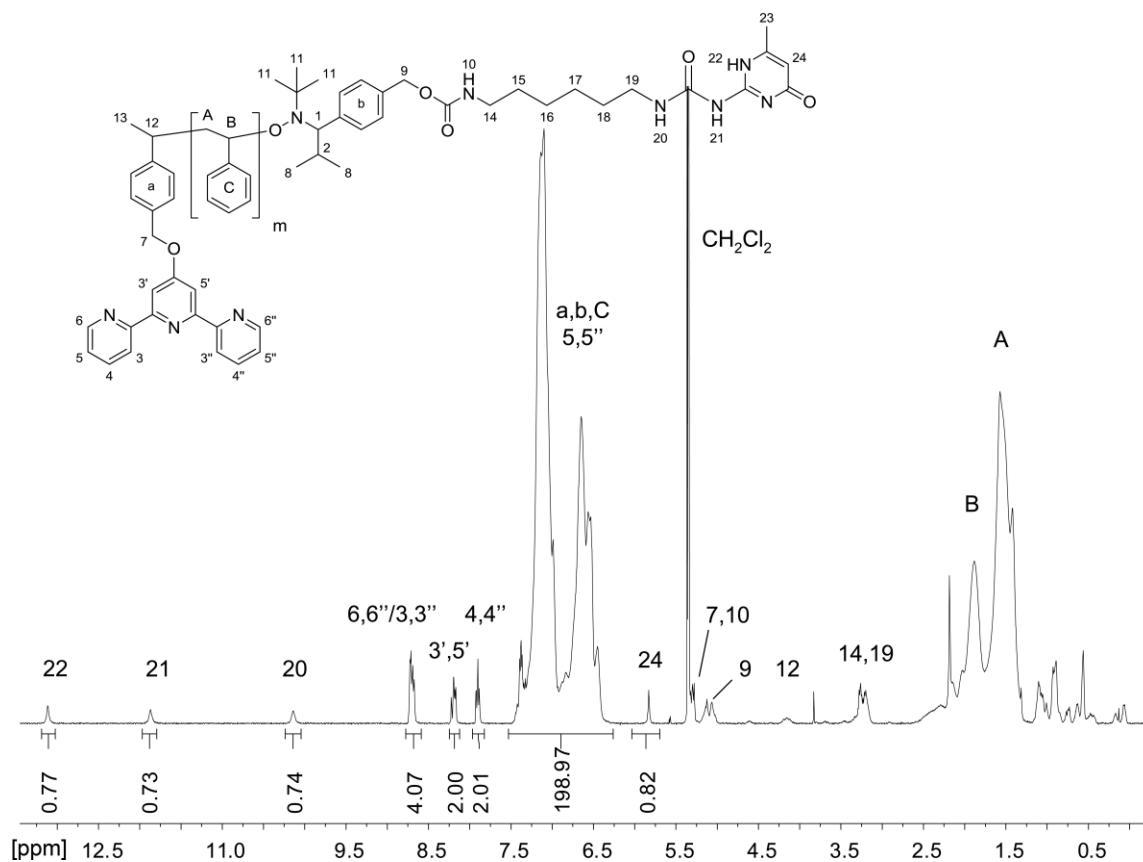

**Figure S1**  $^1\text{H}$  NMR spectrum of **tpy~PS~UPy 6a** (400 MHz,  $\text{CD}_2\text{Cl}_2$ ).

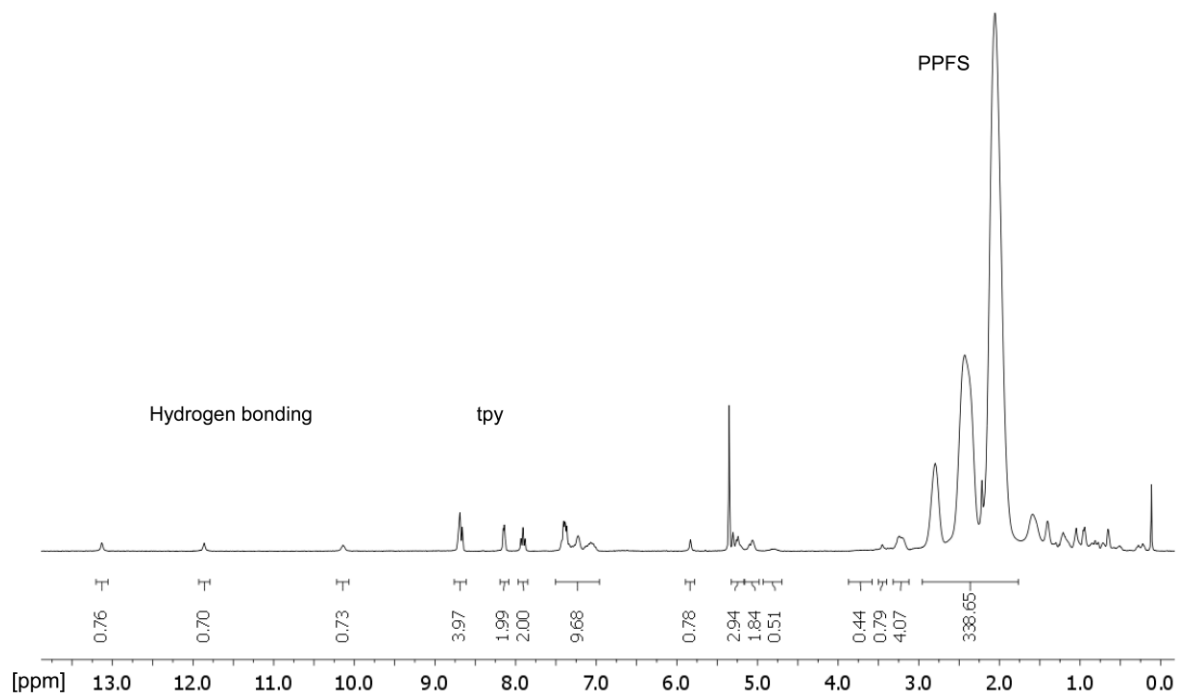

**Figure S2**  $^1\text{H}$  NMR spectrum of **tpy~PPFS~UPy 7** (400 MHz,  $\text{CD}_2\text{Cl}_2$ ).

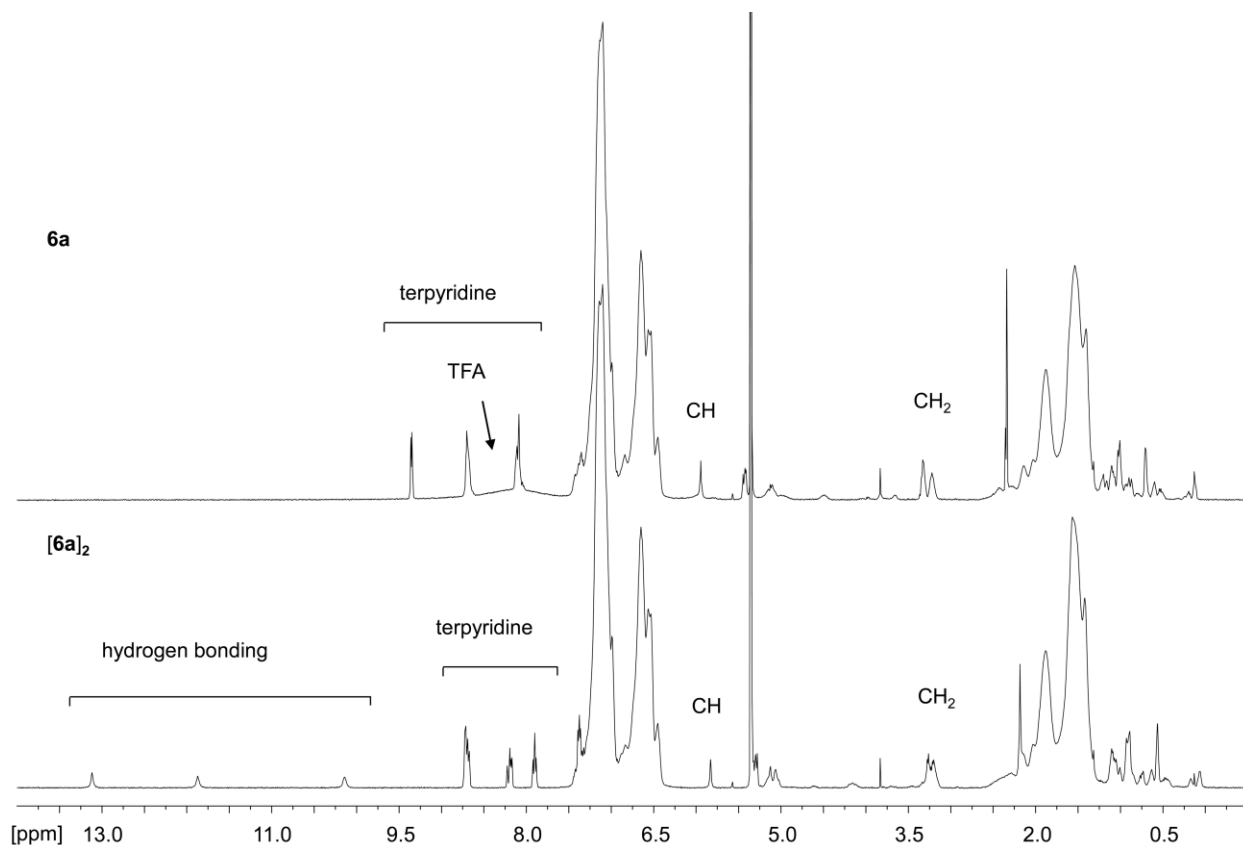

**Figure S3** <sup>1</sup>H NMR spectra for the monomeric (denoted **6a**) and dimeric (denoted **[6a]<sub>2</sub>**) species of tpy~PS~UPy in CD<sub>2</sub>Cl<sub>2</sub> (bottom) and CD<sub>2</sub>Cl<sub>2</sub>-TFA (top) (400 MHz, CD<sub>2</sub>Cl<sub>2</sub>, 298 K).

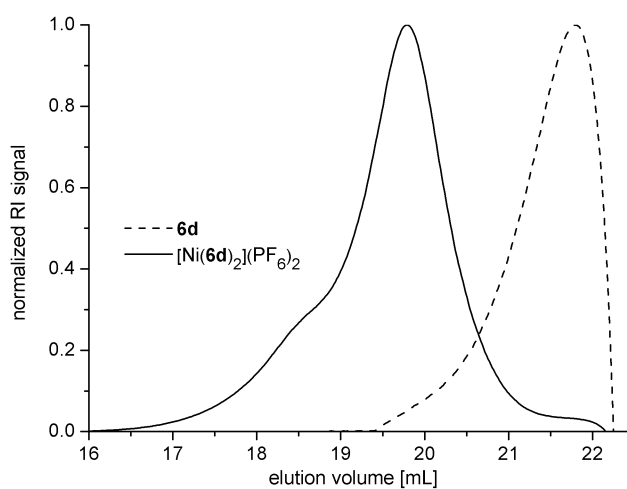

**Figure S4** SEC traces (RI signal) of **6** and **[Ni(6d)<sub>2</sub>](PF<sub>6</sub>)<sub>2</sub>**; eluent: DMAc containing 0.005 M NH<sub>4</sub>PF<sub>6</sub> (Figure was created from data published in *Chem. Commun.*, **2009**, 3386-3388).

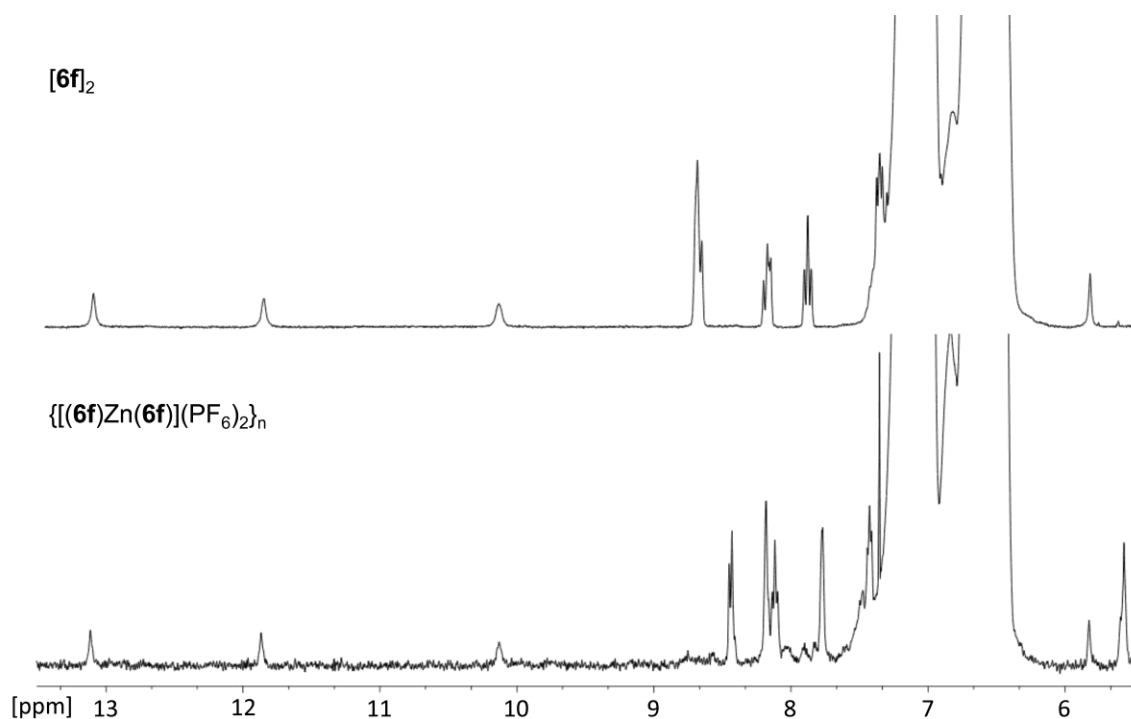

**Figure S5** Zoom into the low-field region of the  $^1\text{H}$  NMR spectra of  $(\mathbf{6f})_2$  (top) and  $\{[(\mathbf{6f})\text{Zn}(\mathbf{6f})](\text{PF}_6)_2\}_n$  (bottom) (400 MHz,  $\text{CD}_2\text{Cl}_2$ , 298 K).

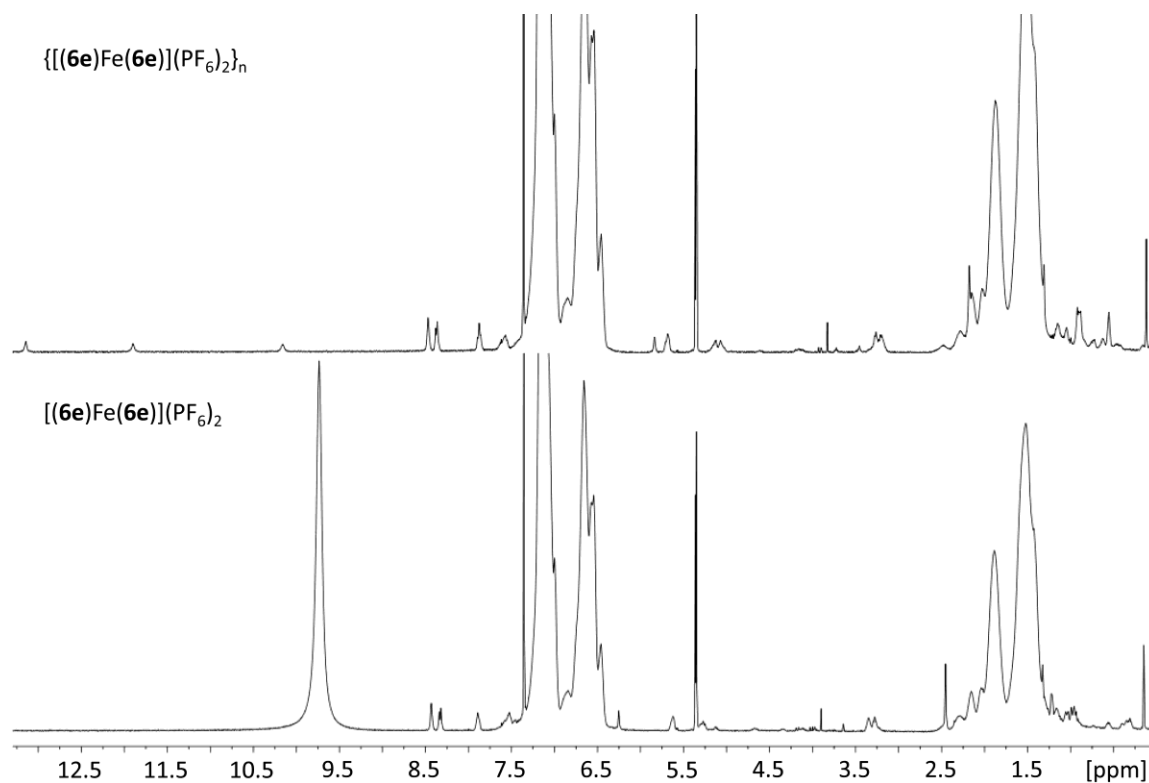

**Figure S6**  $^1\text{H}$  NMR spectra of the linear supramolecular polymer  $\{[(\mathbf{6e})\text{Fe}(\mathbf{6e})](\text{PF}_6)_2\}_n$  (in  $\text{CD}_2\text{Cl}_2$ ) and the dimer  $[(\mathbf{6e})\text{Fe}(\mathbf{6e})](\text{PF}_6)_2$  after the *in-situ* addition of TFA (400 MHz,  $\text{CD}_2\text{Cl}_2$ , 298 K).
